# Supplementary material for: Favorably adjusting the pore characteristics of copper sulfide by template regulation for vapor-phase elemental mercury immobilization
Source: Royal Society of Chemistry journal article supplement (doi:10.1039/d2ta00022a), 2022-01-01
Supplement: d2ta00022a1.pdf [file d2ta00022a1.pdf]

## Supporting Information

### Favorably Adjusting the Pore Characteristics of Copper Sulfide by Template Regulation for Vapor-Phase Elemental Mercury Immobilization

*Wei Zheng<sup>a</sup>, Zequn Yang<sup>a\*</sup>, Jianping Yang<sup>a</sup>, Wenqi Qu<sup>a</sup>, Yong Feng<sup>b</sup>, Shaojian Jiang<sup>a</sup>,  
Shilin Zhao<sup>a</sup>, Kaimin Shih<sup>c</sup>, Hailong Li<sup>a\*\*</sup>*

a. School of Energy Science and Engineering, Central South University, Changsha, 410083, China

b. Environmental Research Institute, South China Normal University, Guangzhou, 510631, China

c. Department of Civil Engineering, The University of Hong Kong, Hong Kong SAR, China

Revision Submitted to

**Journal of Materials Chemistry A**

To whom correspondence should be addressed:

\*TEL: +86-15675117541

E-mail: [Zequn\\_Yang@hotmail.com](mailto:Zequn_Yang@hotmail.com)

\*\*TEL: +86-18670016725

E-mail: [hailongli18@gmail.com](mailto:hailongli18@gmail.com)

### ***Kinetic Simulation***

The pseudo-first order kinetic model was used to predict the Hg<sup>0</sup> adsorption capacity based on an ~80% breakthrough dataset. The Hg<sup>0</sup> adsorption rate was proportional to the difference between the equilibrium capacity and the adsorbed amount at any time, as described as follows:

$$\frac{dQ_t}{dt} = k_1(Q_e - Q_t) \quad (\text{S1})$$

Equation (3) could be modified to the following equation based on the initial conditions of t=0, Q<sub>t</sub>=0:

$$Q_t = Q_e(1 - e^{-k_1 t}) \quad (\text{S2})$$

where the pseudo-first-order kinetic constant ( $k_1, \text{min}^{-1}$ ) can be determined by fitting the adsorption breakthrough curve.

Besides, the pseudo-second-order kinetic model was also adopted to simulate the Hg<sup>0</sup> adsorption behavior, which could be described by equation (S3):

$$\frac{dQ_t}{dt} = k_2(Q_e - Q_t)^2 \quad (\text{S3})$$

Equation (S3) could be modified to the following equation based on the initial conditions of t=0, Q<sub>t</sub>=0:

$$\frac{t}{Q_t} = \frac{1}{k_2 Q_e^2} + \frac{1}{Q_e} t \quad (\text{S4})$$

where the pseudo-second-order kinetic constant ( $k_2, \text{mg g}^{-1} \text{min}^{-1}$ ) can be determined by fitting the adsorption breakthrough curve.

### ***Hg-TPD Test***

First, the fresh sorbent was pretreated at its optimal reaction temperature (75 °C) under  $\sim 100 \mu\text{g m}^{-3}$  carried by  $\text{N}_2$  for a continuous 30 min. Subsequently, the inlet  $\text{Hg}^0$  was cut off, and the Hg-laden sorbent was purged by pure  $\text{N}_2$  at a same temperature until the outlet  $\text{Hg}^0$  equaling to zero. Then, the temperature stepwise increased from 75 to 350 °C with the heating rate of  $10 \text{ }^\circ\text{C min}^{-1}$ . During this process, the desorbed/decomposed mercury was continuously recorded by the on-line mercury analyzer (VM3000, Mercury Instrument, Inc.).

**List of Tables:**

**Table S1.** Experimental conditions

**Table S2.** Performance comparison among benchmark metal sulfides

**Table S1. Experimental conditions**

| Experiments | Materials                      | Carrier gas (1L min <sup>-1</sup> )                                                                                              | Temperature (°C) |
|-------------|--------------------------------|----------------------------------------------------------------------------------------------------------------------------------|------------------|
| Set I       | Cu-BTC<br>CuS-BTCs<br>Nano-CuS | Pure N <sub>2</sub>                                                                                                              | 75               |
| Set II      | 9CuS-BTC                       | Pure N <sub>2</sub>                                                                                                              | 25-100           |
| Set III     | 9CuS-BTC                       | Pure N <sub>2</sub>                                                                                                              | 75               |
| Set IV      | 9CuS-BTC                       | Pure N <sub>2</sub><br>N <sub>2</sub> + 5% O <sub>2</sub><br>N <sub>2</sub> + 5% O <sub>2</sub> + 100 ppm SO <sub>2</sub><br>SFG | 75               |

SFG: Simulated flue gas (5% O<sub>2</sub>, 100 ppm SO<sub>2</sub> and 8% H<sub>2</sub>O carried by N<sub>2</sub>)

**Table S2. Performance comparison among benchmark metal sulfides**

| Sorbents                                                    | Carrier gas                                                | Inlet Hg <sup>0</sup><br>concentration<br>( $\mu\text{g m}^{-3}$ ) | Optimal<br>temperature<br>( $^{\circ}\text{C}$ ) | Hg <sup>0</sup> adsorption capacities<br>( $\text{mg g}^{-1}$ ) | Hg <sup>0</sup><br>adsorption<br>rates<br>( $\mu\text{g g}^{-1} \text{min}^{-1}$ ) | Reference |
|-------------------------------------------------------------|------------------------------------------------------------|--------------------------------------------------------------------|--------------------------------------------------|-----------------------------------------------------------------|------------------------------------------------------------------------------------|-----------|
| CuS-BTC                                                     | N <sub>2</sub>                                             | 100                                                                | 75                                               | 208.50                                                          | 97.30                                                                              | This work |
| FeWS <sub>x</sub> /TiO <sub>2</sub>                         | N <sub>2</sub>                                             | 4300                                                               | 100                                              | 9.00                                                            | 25.00                                                                              | [S1]      |
| [MoS <sub>4</sub> ] <sup>2-</sup> /CoFe-LDH                 | N <sub>2</sub> + 4% O <sub>2</sub>                         | 350                                                                | 75                                               | 16.39                                                           | 5.00                                                                               | [S1]      |
| Disordered MoS <sub>2</sub>                                 | N <sub>2</sub> + 6% O <sub>2</sub> + 6%<br>SO <sub>2</sub> | 240                                                                | 100                                              | 16.39                                                           | 3.83                                                                               | [S2]      |
| Mn-SnS <sub>2</sub>                                         | N <sub>2</sub> + 5% O <sub>2</sub>                         | 300                                                                | 150                                              | 0.57                                                            | 9.45                                                                               | [S1]      |
| Fe-ZnS                                                      | Air                                                        | 1600                                                               | 20                                               | 8.65                                                            | 4.82                                                                               | [S1]      |
| MoS <sub>3</sub> / $\gamma$ -Fe <sub>2</sub> O <sub>3</sub> | N <sub>2</sub>                                             | 110                                                                | 60                                               | 12.80                                                           | 1.55                                                                               | [S1]      |
| Co <sub>9</sub> S <sub>8</sub> -PC                          | N <sub>2</sub>                                             | 210                                                                | 100                                              | 43.18                                                           | 12.15                                                                              | [S3]      |
| MoS <sub>3</sub> /TiO <sub>2</sub>                          | N <sub>2</sub>                                             | 280                                                                | 60                                               | 28.10                                                           | 24.80                                                                              | [S1]      |
| Co <sub>x</sub> Zn <sub>1-x</sub> S                         | N <sub>2</sub> + O <sub>2</sub>                            | 1100                                                               | 50                                               | 46.01                                                           | 17.00                                                                              | [S1]      |
| ZnO@CuS                                                     | N <sub>2</sub>                                             | 800                                                                | 75                                               | 60.53                                                           | 16.81                                                                              | [S4]      |
| Fe <sub>3</sub> O <sub>4</sub> @CuS                         | N <sub>2</sub>                                             | 90                                                                 | 75                                               | 88.70                                                           | 13.25                                                                              | [S1]      |
| nano-CuS                                                    | N <sub>2</sub>                                             | 90                                                                 | 75                                               | 122.40                                                          | 13.56                                                                              | [S1]      |
| Sulfurated Fe-Ti<br>spinel                                  | N <sub>2</sub>                                             | 4300                                                               | 60                                               | 48.60                                                           | 43.30                                                                              | [S1]      |
| FeMoS <sub>x</sub> /TiO <sub>2</sub>                        | N <sub>2</sub>                                             | 4300                                                               | 60                                               | 41.80                                                           | 72.20                                                                              | [S1]      |
| Co <sub>3</sub> S <sub>4</sub>                              | N <sub>2</sub>                                             | 1300                                                               | 100                                              | 43.03                                                           | 84.10                                                                              | [S1]      |
| Sulfureted MoO <sub>3</sub> /Fe-<br>Ti spinel               | SFG                                                        | 4300                                                               | 60                                               | 66.30                                                           | 93.30                                                                              | [S1]      |

Simulated flue gas (SFG) contains N<sub>2</sub>, O<sub>2</sub>, SO<sub>2</sub>, and H<sub>2</sub>O.

## **List of Figures:**

**Figure S1.** XRD patterns of different samples

**Figure S2.** Areas as selected to conduct the EDS characterizations of Cu-BTC, 9CuS-BTC and 24CuS-BTC

**Figure S3.** EDS line scanning of Cu-BTC, 9CuS-BTC, and 24CuS-BTC

**Figure S4.** EDS mappings of Cu-BTC, 9CuS-BTC, and 24CuS-BTC

**Figure S5.** The distribution of micropores in Cu-BTC

**Figure S6.** A diagrammatical illustration on the transformation of Cu-BTC to 24CuS-BTC

**Figure S7.** Comparison between the high-resolution SEM images of 9CuS-BTC and 24CuS-BTC

**Figure S8.** The breakthrough curve of 9CuS-BTC

**Figure S1. XRD patterns of different samples**

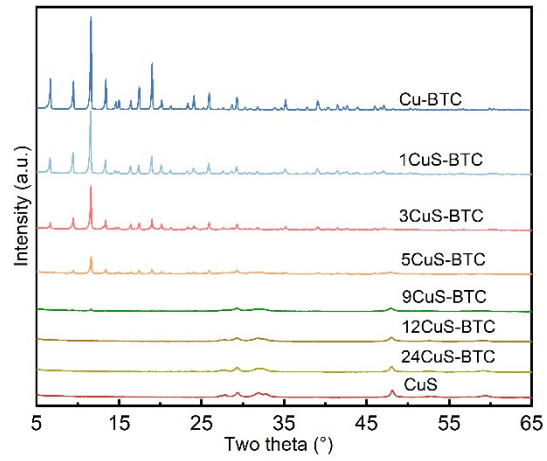



**Figure S2. Areas as selected to conduct the EDS characterizations of Cu-BTC, 9CuS-BTC and 24CuS-BTC**

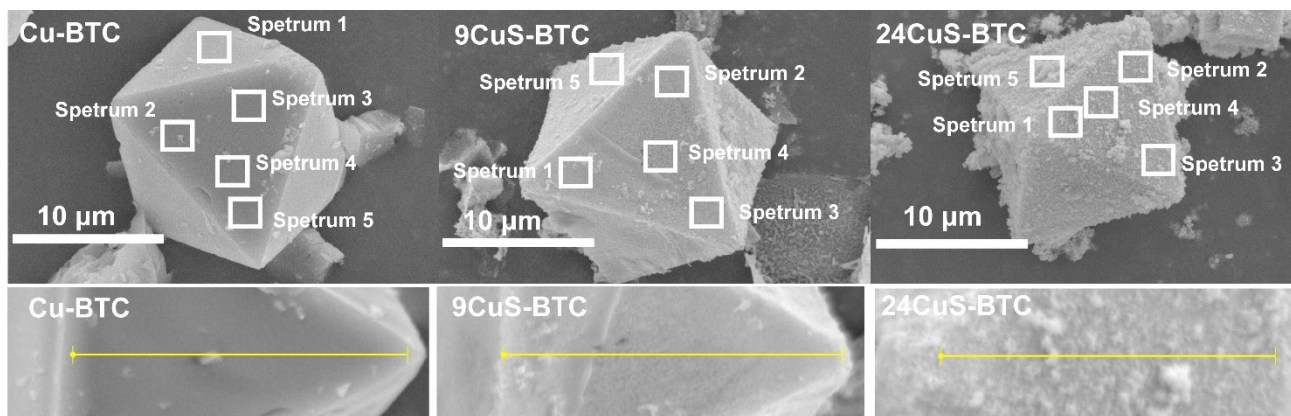

**Figure S3. EDS line scanning of Cu-BTC, 9CuS-BTC, and 24CuS-BTC**

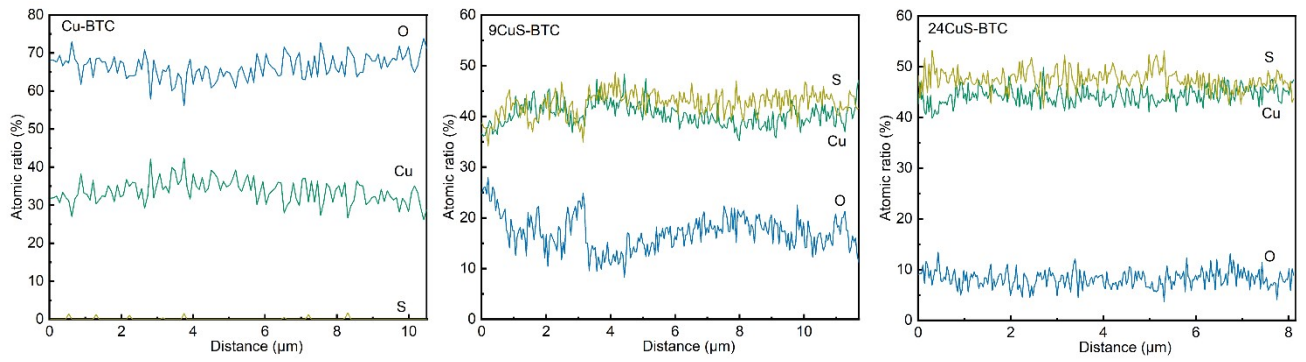

**Figure S4. EDS mappings of Cu-BTC, 9CuS-BTC, and 24CuS-BTC**

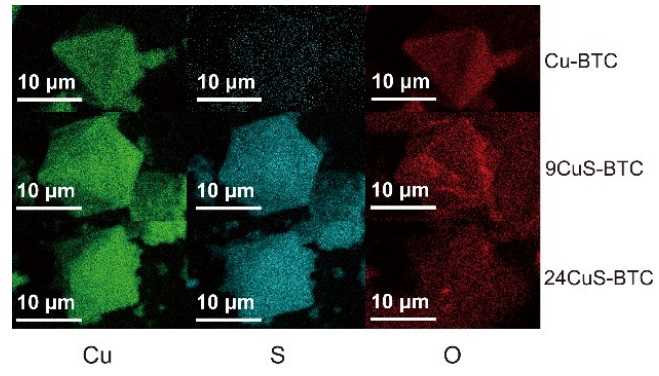

**Figure S5. The distribution of micropores in Cu-BTC**

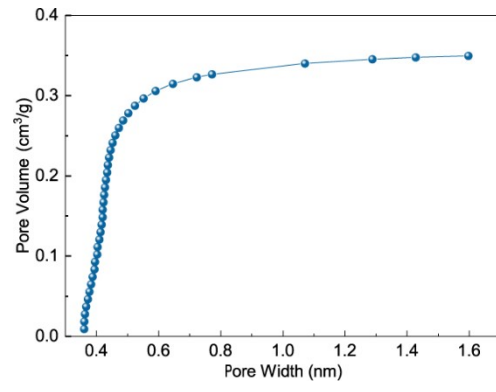

**Figure S6. A diagrammatical illustration on the transformation of Cu-BTC to 24CuS-BTC**

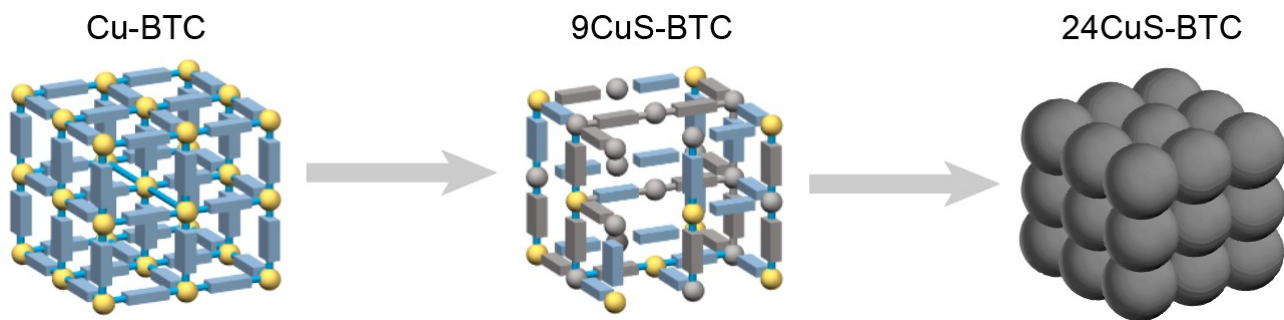

**Figure S7. Comparison between the high-resolution SEM images of 9CuS-BTC and 24CuS-BTC**

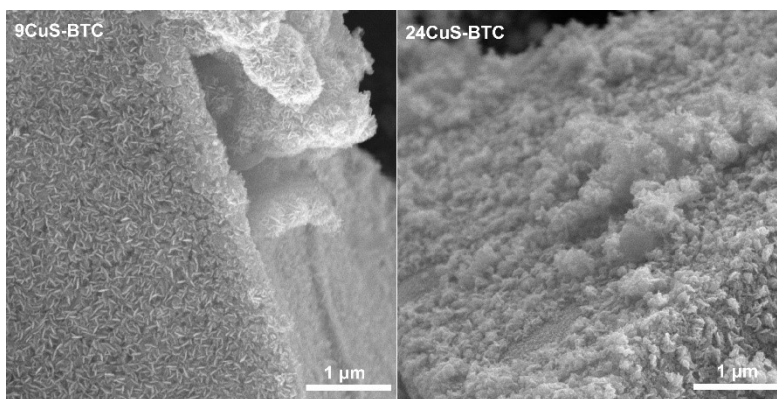

**Figure S8. The breakthrough curve of 9CuS-BTC**

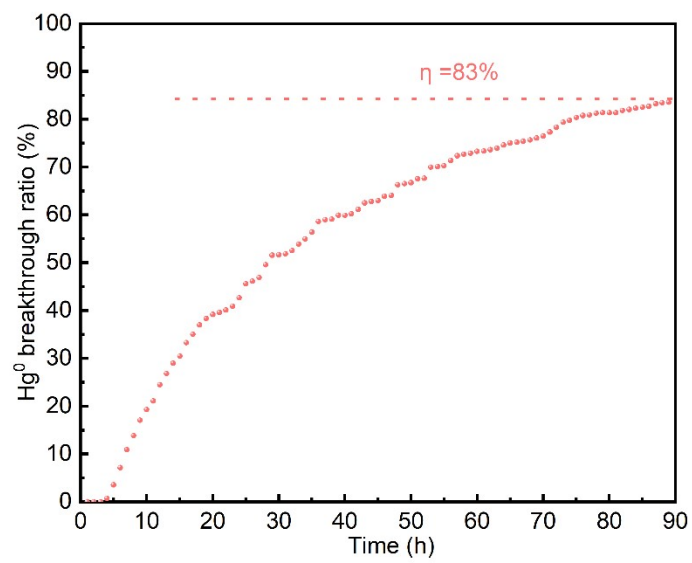

## Reference

- [1] W. Zheng, H. Li, Z. Yang, J. Yang, W. Qu, F. Meng, Y. Feng, Z. Xu, X. Guo, *Chem. Eng. J.*, 2021, **411**, 128608.
- [2] H. Liu, C. Liu, K. Xiang, C. Li, X. Xie, H. Chen, P. Wang, F. Shen, *ACS ES&T Eng.*, 2021, **1**, 1258-1266.
- [3] S. Yang, C. Liu, P. Wang, H. Yi, F. Shen, H. Liu, *J. Hazard. Mater.*, 2021, **412**, 124970.
- [4] Q. Hong, H. Xu, J. Li, W. Huang, P. Liu, Z. Qu and N. Yan, *Chem. Eng. J.*, 2021, **420**, 127592.
